# Supplementary material for: Overtransfusion of packed red blood cells during massive transfusion activation: a potential quality metric for trauma resuscitation
Source: HighWire-hosted journal article supplement (doi:10.1136/tsaco-2022-000896), 2022-07-01
Supplement: tsaco-2022-000896supp001_data_supplement.pdf [file tsaco-2022-000896supp001_data_supplement.pdf]

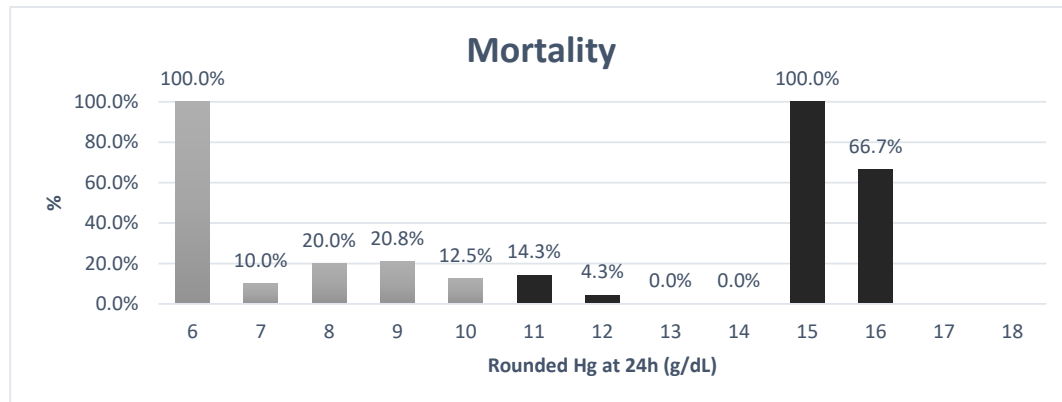

**Appendix 1:** In-hospital mortality rate based on a rounded hemoglobin (Hb) value at 24 hours after the conclusion of the massive transfusion protocol (MTP.)
