# Supplementary material for: Overtransfusion of packed red blood cells during massive transfusion activation: a potential quality metric for trauma resuscitation
Source: HighWire-hosted journal article supplement (doi:10.1136/tsaco-2022-000896), 2022-07-01
Supplement: tsaco-2022-000896supp002_data_supplement.pdf [file tsaco-2022-000896supp002_data_supplement.pdf]

**Appendix 2:** Comparison of %mortality with odds ratio (OR) and 95% confidence interval (CI) based on a hemoglobin (Hg) value of 10, 11, and 12 g/dL.

| <b>Compared groups</b>        | <b>Mortality</b> | <b>OR (95% CI)</b> | <b>p value</b> |
|-------------------------------|------------------|--------------------|----------------|
| Hg < 10 g/dL vs. Hg ≥ 10 g/dL | 18.2% vs. 12.2%  | 0.62 (0.24, 1.59)  | 0.319          |
| Hg < 11 g/dL vs. Hg ≥ 11 g/dL | 17.7% vs. 11.5%  | 0.60 (0.23, 1.60)  | 0.305          |
| Hg < 12 g/dL vs. Hg ≥ 12 g/dL | 15.5% vs. 12.5%  | 0.78 (0.21, 2.88)  | >0.999         |
